# Supplementary material for: Identification and characterization of a supraclavicular brown adipose tissue in mice
Source: JCI journal article supplement (doi:10.1172/jci.insight.93166), 2017-06-01
Supplement: sd1 [file 1]

## Supplemental Text and Figures

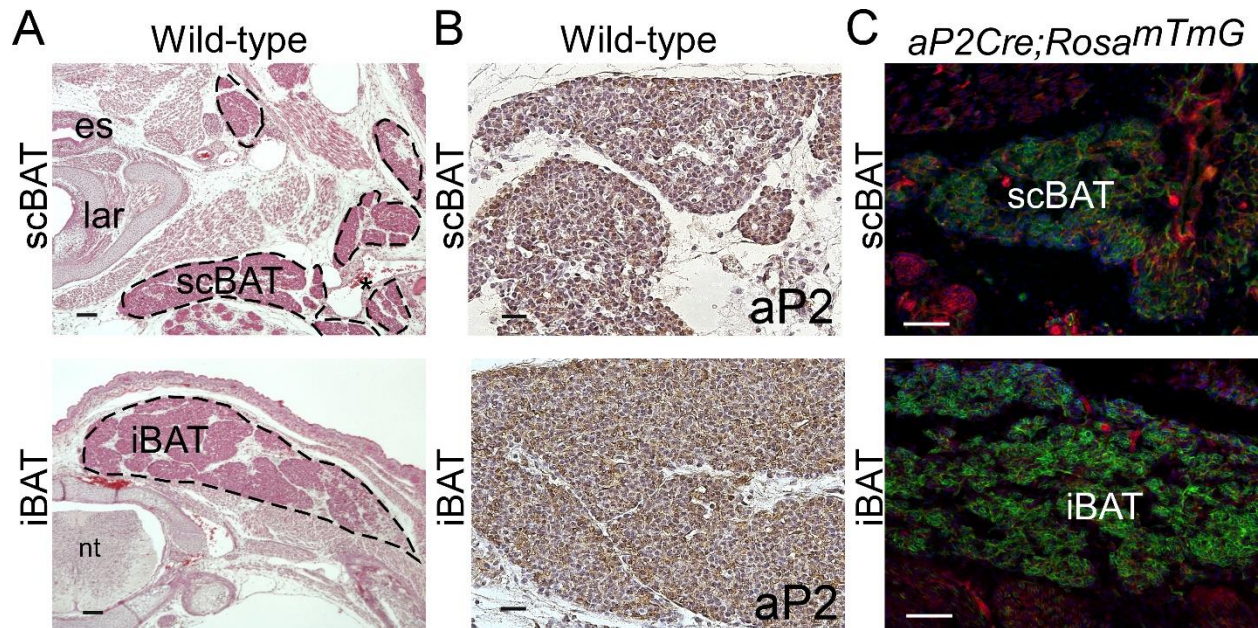

Supplemental Figure 1

**scBAT can be readily identified in E16.5 mouse embryos.** (A) Representative H&E stained transverse sections from E16.5 mouse embryonic ventral neck and thoracic regions showing anatomical locations of the iBAT and scBAT depots. es: esophagus, lar: larynx, \*: external jugular vein, nt: neural tube. n = 4. Scale bar: 200  $\mu$ m. (B) Immunohistochemistry staining of E16.5 iBAT and scBAT sections using an antibody against aP2/Fabp4. n = 3. Scale bar: 50  $\mu$ m. (C) Both iBAT and scBAT express Cre in an adipose tissue specific Cre mouse, *aP2/Fabp4-Cre*, at E16.5. Cre recombinase expression is revealed as GFP positive signal (green) in *aP2/Fabp4-Cre; ROSA<sup>mTmG</sup>* reporter mice. n = 3. Scale bar: 100  $\mu$ m.

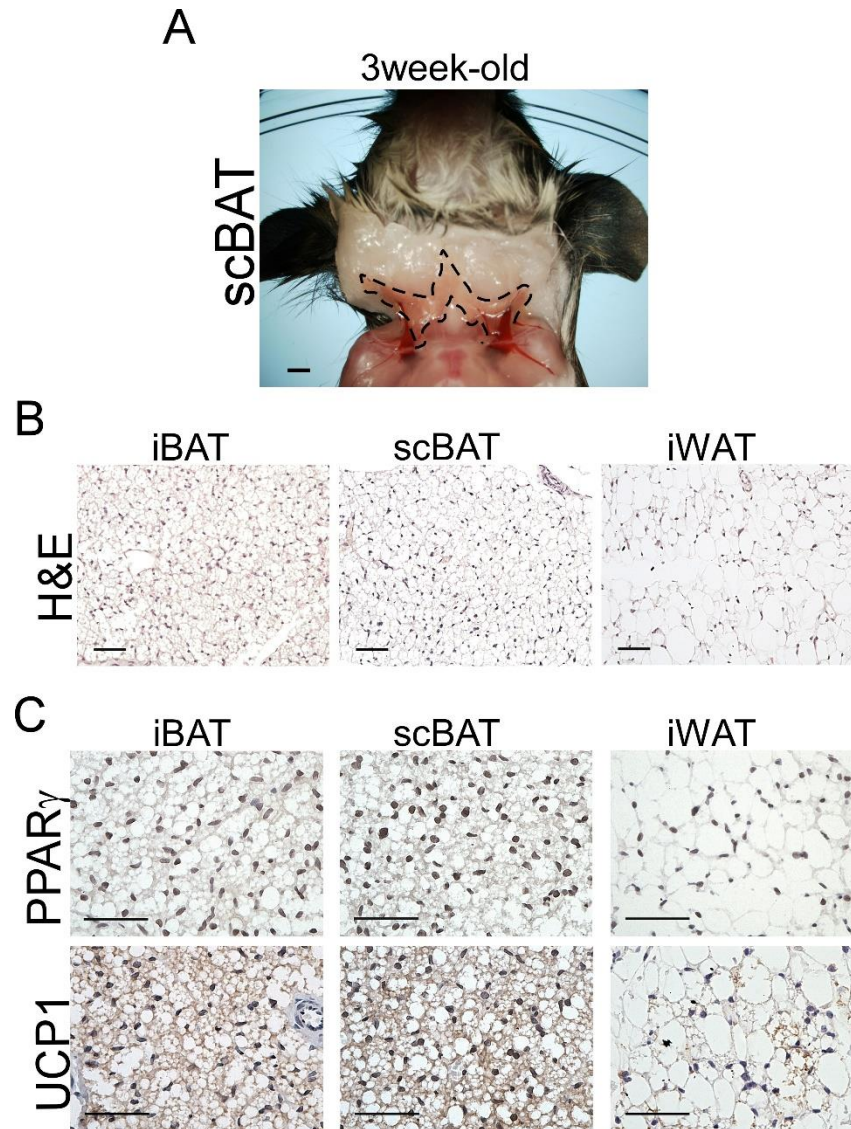

Supplemental Figure 2

**Growth of scBAT continues after birth.** (A) Representative image showing the anatomical location of scBAT in a 3-week-old mouse (ventral view). scBAT is outlined with the black dotted line. Scale bar: 1000  $\mu$ m. (B) Representative H&E stained transverse sections of iBAT, scBAT, and iWAT. n = 3. Scale bar: 50  $\mu$ m. (C) Immunohistochemistry of paraffin embedded iBAT, scBAT, and iWAT sections using antibodies against PPAR $\gamma$  and UCP1. n = 3. Scale bar: 50  $\mu$ m.

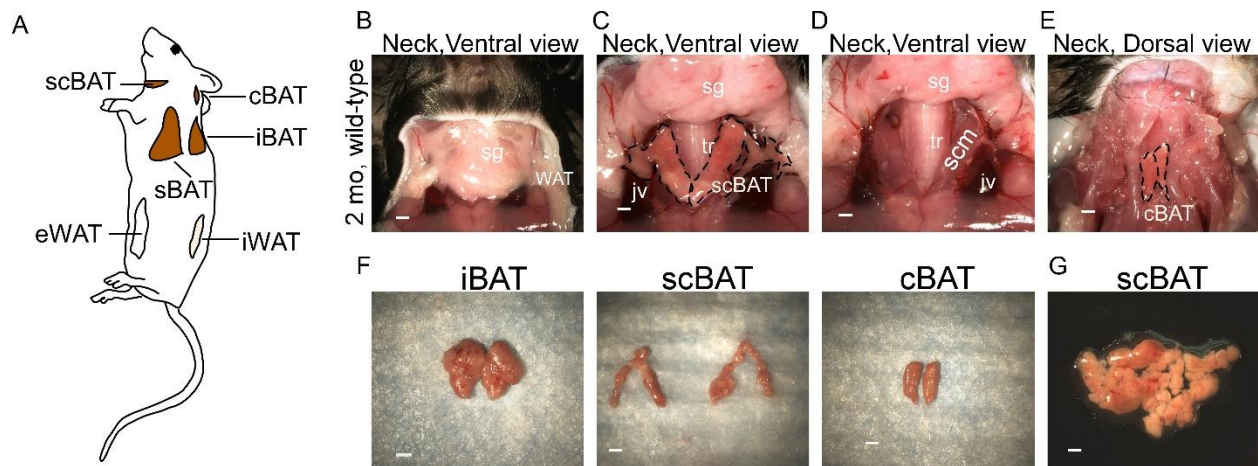

Supplemental Figure 3

**Step-by-step illustration of scBAT dissection.** (A) Schematic showing the anatomical locations of cBAT, scBAT, iBAT, sBAT, iWAT, and eWAT. (B) The mouse ventral neck after removing skin to reveal the salivary gland, WAT, and superficial muscle. 2 mo: 2 month old (C) scBAT, the jugular vein, and the trachea (covered by sternohyoid muscle) are revealed after the salivary gland is moved upward. (D) Ventral neck image after removing scBAT. (E) cBAT is revealed after removing the skin, WAT, and muscle in the dorsal neck. scBAT and cBAT are outlined with the black dotted line. (F) Images of iBAT, scBAT, and cBAT. (G) Image showing that scBAT is composed of small lobes of brown adipocytes. Scale bar: 1000  $\mu\text{m}$  (B-G).

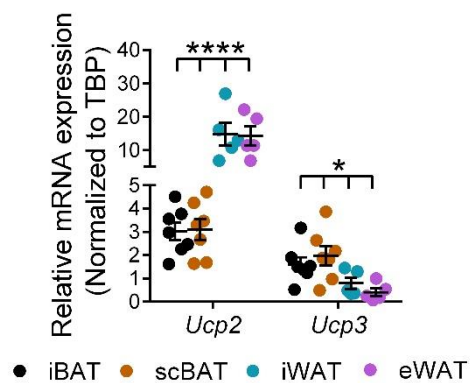

Supplemental Figure 4

**Lower expression of *Ucp2* and *Ucp3* in scBAT.** Relative mRNA expression of *Ucp2* and *Ucp3* in iBAT, scBAT, iWAT, and eWAT isolated from 8-week-old mice. Data are presented as mean  $\pm$  SEM.  $n = 5-7$ . \*\*\*\* $P < 0.0001$ , \* $P < 0.05$ . One-way ANOVA.



A

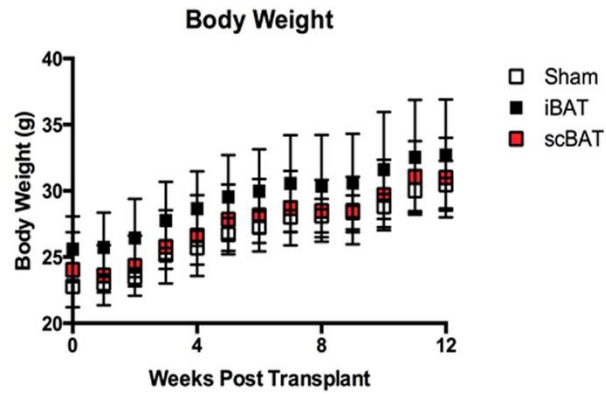

B

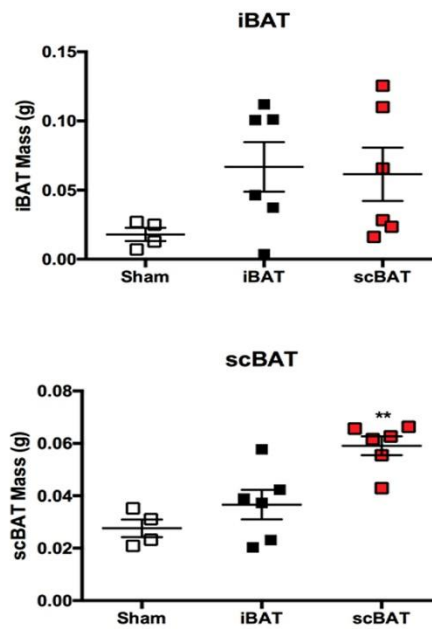

Supplemental Figure 5

**Body weight was not reduced in BAT transplanted mice.** (A) Body weight (g) and (B) tissue weights of endogenous iBAT and scBAT from BAT transplanted groups and sham-operated group. Data are presented as mean  $\pm$  SEM.  $n = 4-6$ . \*\* $P < 0.01$ . One-way ANOVA.

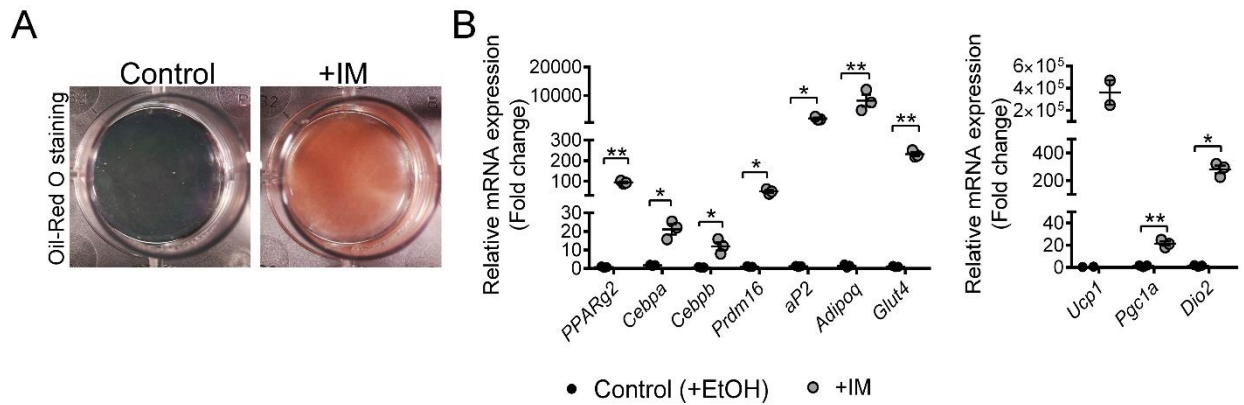

Supplemental Figure 6

**Immortalized stromal-vascular fraction (SVF) cells (P7scBAT-C4 cells) isolated from scBAT can differentiate into mature brown adipocytes.** (A) Oil-red O staining of lipid droplet accumulation in differentiated P7scBAT-C4 cells. IM: induction medium. (B) Relative mRNA expression of BAT markers in differentiated P7scBAT-C4 cells. Data is presented as mean  $\pm$  SEM.  $n = 2-3$ . \*\* $P < 0.01$ , \* $P < 0.05$ . Two tailed  $t$  test. Specific gene expression was normalized to b-actin.

Supplemental Table 1: **Biological process gene ontology terms showing statistically significant enrichment in the set of scBAT-specific genes in scBAT v.s. iWAT.**

| Term                                                                            | Count | %        | P Value  |
|---------------------------------------------------------------------------------|-------|----------|----------|
| GO:0006811~ion transport                                                        | 54    | 8.035714 | 1.71E-09 |
| GO:0055114~oxidation reduction                                                  | 51    | 7.589286 | 5.21E-09 |
| GO:0006091~generation of precursor metabolites and energy                       | 46    | 6.845238 | 1.46E-21 |
| GO:0006812~cation transport                                                     | 34    | 5.059524 | 5.36E-05 |
| GO:0030001~metal ion transport                                                  | 30    | 4.464286 | 1.00E-04 |
| GO:0055085~transmembrane transport                                              | 29    | 4.315476 | 4.55E-04 |
| GO:0042592~homeostatic process                                                  | 28    | 4.166667 | 0.022091 |
| GO:0007517~muscle organ development                                             | 24    | 3.571429 | 4.41E-09 |
| GO:0051186~cofactor metabolic process                                           | 24    | 3.571429 | 8.47E-09 |
| GO:0015672~monovalent inorganic cation transport                                | 23    | 3.422619 | 1.70E-04 |
| GO:0045941~positive regulation of transcription                                 | 23    | 3.422619 | 0.036426 |
| GO:0015980~energy derivation by oxidation of organic compounds                  | 22    | 3.27381  | 1.48E-12 |
| GO:0048878~chemical homeostasis                                                 | 22    | 3.27381  | 0.004465 |
| GO:0005996~monosaccharide metabolic process                                     | 21    | 3.125    | 1.71E-06 |
| GO:0045893~positive regulation of transcription, DNA-dependent                  | 21    | 3.125    | 0.03261  |
| GO:0060537~muscle tissue development                                            | 20    | 2.97619  | 3.32E-08 |
| GO:0006006~glucose metabolic process                                            | 20    | 2.97619  | 5.36E-08 |
| GO:0042692~muscle cell differentiation                                          | 19    | 2.827381 | 1.65E-08 |
| GO:0006631~fatty acid metabolic process                                         | 19    | 2.827381 | 1.46E-05 |
| GO:0045944~positive regulation of transcription from RNA polymerase II promoter | 19    | 2.827381 | 0.028435 |
| GO:0022900~electron transport chain                                             | 18    | 2.678571 | 5.09E-08 |
| GO:0051146~striated muscle cell differentiation                                 | 17    | 2.529762 | 1.05E-08 |
| GO:0007507~heart development                                                    | 17    | 2.529762 | 0.001457 |
| GO:0050801~ion homeostasis                                                      | 17    | 2.529762 | 0.018821 |
| GO:0007010~cytoskeleton organization                                            | 17    | 2.529762 | 0.044327 |
| GO:0003012~muscle system process                                                | 16    | 2.380952 | 1.26E-09 |
| GO:0045333~cellular respiration                                                 | 15    | 2.232143 | 2.00E-09 |
| GO:0006936~muscle contraction                                                   | 15    | 2.232143 | 2.53E-09 |
| GO:0048568~embryonic organ development                                          | 15    | 2.232143 | 0.016926 |
| GO:0006084~acetyl-CoA metabolic process                                         | 14    | 2.083333 | 2.22E-12 |
| GO:0006820~anion transport                                                      | 14    | 2.083333 | 1.79E-04 |
| GO:0006813~potassium ion transport                                              | 14    | 2.083333 | 0.001313 |
| GO:0055001~muscle cell development                                              | 13    | 1.934524 | 2.66E-07 |
| GO:0055080~cation homeostasis                                                   | 13    | 1.934524 | 0.011355 |
| GO:0015698~inorganic anion transport                                            | 12    | 1.785714 | 4.41E-05 |
| GO:0006163~purine nucleotide metabolic process                                  | 12    | 1.785714 | 0.010409 |

|                                                                  |    |          |          |
|------------------------------------------------------------------|----|----------|----------|
| GO:0044057~regulation of system process                          | 12 | 1.785714 | 0.046121 |
| GO:0046356~acetyl-CoA catabolic process                          | 11 | 1.636905 | 8.89E-10 |
| GO:0048738~cardiac muscle tissue development                     | 11 | 1.636905 | 7.90E-06 |
| GO:0016052~carbohydrate catabolic process                        | 11 | 1.636905 | 1.79E-04 |
| GO:0048562~embryonic organ morphogenesis                         | 11 | 1.636905 | 0.026783 |
| GO:0030036~actin cytoskeleton organization                       | 11 | 1.636905 | 0.031006 |
| GO:0006096~glycolysis                                            | 10 | 1.488095 | 6.05E-06 |
| GO:0007519~skeletal muscle tissue development                    | 10 | 1.488095 | 3.40E-04 |
| GO:0051188~cofactor biosynthetic process                         | 10 | 1.488095 | 0.00188  |
| GO:0055065~metal ion homeostasis                                 | 10 | 1.488095 | 0.005276 |
| GO:0016042~lipid catabolic process                               | 10 | 1.488095 | 0.022314 |
| GO:0010927~cellular component assembly involved in morphogenesis | 9  | 1.339286 | 1.05E-05 |
| GO:0006821~chloride transport                                    | 9  | 1.339286 | 5.21E-04 |
| GO:0009108~coenzyme biosynthetic process                         | 9  | 1.339286 | 7.23E-04 |
| GO:0055074~calcium ion homeostasis                               | 9  | 1.339286 | 0.008741 |
| GO:0006816~calcium ion transport                                 | 9  | 1.339286 | 0.03281  |
| GO:0030239~myofibril assembly                                    | 8  | 1.190476 | 8.93E-07 |
| GO:0006874~cellular calcium ion homeostasis                      | 8  | 1.190476 | 0.021715 |
| GO:0035051~cardiac cell differentiation                          | 7  | 1.041667 | 4.42E-04 |
| GO:0006112~energy reserve metabolic process                      | 7  | 1.041667 | 8.36E-04 |
| GO:0042471~ear morphogenesis                                     | 7  | 1.041667 | 0.029048 |
| GO:0050873~brown fat cell differentiation                        | 6  | 0.892857 | 0.001717 |
| GO:0005977~glycogen metabolic process                            | 6  | 0.892857 | 0.003103 |
| GO:0048747~muscle fiber development                              | 6  | 0.892857 | 0.005792 |
| GO:0044242~cellular lipid catabolic process                      | 6  | 0.892857 | 0.028216 |
| GO:0045444~fat cell differentiation                              | 6  | 0.892857 | 0.038876 |
| GO:0055006~cardiac cell development                              | 5  | 0.744048 | 6.85E-04 |
| GO:0006090~pyruvate metabolic process                            | 5  | 0.744048 | 0.006632 |
| GO:0031214~biomineral formation                                  | 5  | 0.744048 | 0.021605 |
| GO:0055003~cardiac myofibril assembly                            | 4  | 0.595238 | 5.36E-04 |
| GO:0045214~sarcomere organization                                | 4  | 0.595238 | 0.00394  |
| GO:0009066~aspartate family amino acid metabolic process         | 4  | 0.595238 | 0.028664 |
| GO:0006941~striated muscle contraction                           | 4  | 0.595238 | 0.036022 |
| GO:0034440~lipid oxidation                                       | 4  | 0.595238 | 0.036022 |
| GO:0014823~response to activity                                  | 3  | 0.446429 | 0.012985 |
| GO:0006085~acetyl-CoA biosynthetic process                       | 3  | 0.446429 | 0.012985 |
| GO:0045426~quinone cofactor biosynthetic process                 | 3  | 0.446429 | 0.035919 |
| GO:0007009~plasma membrane organization                          | 3  | 0.446429 | 0.035919 |
| GO:0043484~regulation of RNA splicing                            | 3  | 0.446429 | 0.035919 |



Supplemental Table 2. **Sixty-one genes are specifically expressed at higher levels in scBAT v.s. iBAT and WAT (FC > 5, FDR < 0.05).** FC: fold change, FDR: false discovery rate.

| EntrezGene | Gene symbol   | Gene Name                                                                | FC (scBAT/iBAT) | FDR (scBAT/iBAT) |
|------------|---------------|--------------------------------------------------------------------------|-----------------|------------------|
| NA         | 1500016L03Rik | Mus musculus RIKEN cDNA 1500016L03 gene (1500016L03Rik), non-coding RNA. | 112.961781      | 6.41E-08         |
| 228151     | 4833423E24Rik | Mus musculus RIKEN cDNA 4833423E24 gene (4833423E24Rik), mRNA.           | 51.341769       | 4.93E-05         |
| 233099     | Scgb2b27      | Mus musculus secretoglobin, family 2B, member 27 (Scgb2b27), mRNA.       | 39.9200968      | 1.02E-13         |
| 56365      | Clcnkb        | Mus musculus chloride channel Kb (Clcnkb), mRNA.                         | 39.5130119      | 0.040356608      |
| 12095      | Bglap3        | NA                                                                       | 39.3878206      | 4.43E-08         |
| 16869      | Lhx1          | Mus musculus LIM homeobox protein 1 (Lhx1), mRNA.                        | 38.905562       | 2.43E-27         |
| 83380      | Prp2          | Mus musculus proline rich protein 2 (Prp2), mRNA.                        | 35.0779555      | 1.60E-05         |
| 381819     | A630073D07Rik | Mus musculus RIKEN cDNA A630073D07 gene (A630073D07Rik), mRNA.           | 34.3397601      | 2.53E-06         |
| 11354      | Scgb1b27      | Mus musculus secretoglobin, family 1B, member 27 (Scgb1b27), mRNA.       | 33.466295       | 3.89E-13         |
| 22139      | Ttr           | Mus musculus transthyretin (Ttr), mRNA.                                  | 33.4166077      | 2.09E-07         |
| 192200     | Wfdc12        | Mus musculus WAP four-disulfide core domain 12 (Wfdc12), mRNA.           | 32.6348831      | 2.99E-10         |
| 16612      | Klk1          | Mus musculus kallikrein 1 (Klk1), mRNA.                                  | 32.0840887      | 4.75E-06         |
| 114600     | Gm4736        | Mus musculus predicted gene 4736 (Gm4736), mRNA.                         | 30.8516646      | 4.66E-07         |
| 100043232  | 3110099E03Rik | Mus musculus RIKEN cDNA 3110099E03 gene (3110099E03Rik), non-coding RNA. | 30.3842461      | 5.01E-06         |
| 76113      | Lpo           | Mus musculus lactoperoxidase (Lpo), mRNA.                                | 30.1571661      | 1.38E-08         |
| 12097      | Bglap2        | Mus musculus bone gamma-carboxyglutamate protein 2 (Bglap2), mRNA.       | 29.8462468      | 0.021106693      |
| 17844      | Mup5          | Mus musculus major urinary protein 5 (Mup5), mRNA.                       | 29.76717331     | 4.84E-11         |
| 21419      | Tfap2b        | Mus musculus transcription factor AP-2 beta (Tfap2b), mRNA.              | 28.8218361      | 0.000621104      |
| 11571      | Crisp1        | Mus musculus cysteine-rich secretory protein 1 (Crisp1), mRNA.           | 28.5843946      | 1.59E-10         |
| 381833     | Prb1          | Mus musculus proline-rich protein BstNI subfamily 1 (Prb1), mRNA.        | 28.128162       | 9.47E-06         |
| 192212     | Prom2         | Mus musculus prominin 2 (Prom2), mRNA.                                   | 27.521939       | 1.84E-06         |
| NA         | Chia          | Mus musculus chitinase, acidic (Chia), mRNA.                             | 27.2336643      | 5.48E-11         |

|        |               |                                                                                                                 |            |             |
|--------|---------------|-----------------------------------------------------------------------------------------------------------------|------------|-------------|
| 17830  | Prol1         | Mus musculus proline rich, lacrimal 1 (Prol1), mRNA.                                                            | 27.0480639 | 0.000537072 |
| 19131  | Prh1          | Mus musculus proline rich protein HaeIII subfamily 1 (Prh1), mRNA.                                              | 27.0358763 | 2.83E-05    |
| 229722 | 5330417C22Rik | Mus musculus RIKEN cDNA 5330417C22 gene (5330417C22Rik), mRNA.                                                  | 26.8335667 | 2.35653E-05 |
| 17341  | Bhlha15       | Mus musculus basic helix-loop-helix family, member a15 (Bhlha15), mRNA.                                         | 25.6052853 | 4.63E-09    |
| 58214  | Cst10         | Mus musculus cystatin 10 (chondrocytes) (Cst10), mRNA.                                                          | 25.3060977 | 3.39E-12    |
| 14425  | Galnt3        | Mus musculus UDP-N-acetyl-alpha-D-galactosamine:polypeptide N-acetylgalactosaminyltransferase 3 (Galnt3), mRNA. | 25.2560724 | 3.66E-05    |
| 381832 | Prpmp5        | Mus musculus proline-rich protein MP5 (Prpmp5), mRNA.                                                           | 24.8027135 | 6.06E-07    |
| NA     | Gm17495       | Mus musculus predicted gene, 17495 (Gm17495), mRNA.                                                             | 24.1414589 | 0.000195699 |
| 67719  | 2310057J18Rik | Mus musculus RIKEN cDNA 2310057J18 gene (2310057J18Rik), mRNA.                                                  | 23.9269215 | 2.92E-12    |
| 18511  | Pax9          | Mus musculus paired box gene 9 (Pax9), mRNA.                                                                    | 23.0419635 | 1.42E-06    |
| 19752  | Rnase1        | Mus musculus ribonuclease, RNase A family, 1 (pancreatic) (Rnase1), mRNA.                                       | 22.4542834 | 0.000271902 |
| 12353  | Car6          | Mus musculus carbonic anhydrase 6 (Car6), mRNA.                                                                 | 21.8499984 | 2.66E-10    |
| 13419  | Dnase1        | Mus musculus deoxyribonuclease I (Dnase1), mRNA.                                                                | 19.7555411 | 1.84E-10    |
| 110308 | Krt5          | Mus musculus keratin 5 (Krt5), mRNA.                                                                            | 19.6788821 | 0.000828969 |
| 16538  | Kcns1         | Mus musculus K+ voltage-gated channel, subfamily S, 1 (Kcns1), mRNA.                                            | 19.0723817 | 0.004888063 |
| 232016 | Ccdc129       | Mus musculus coiled-coil domain containing 129 (Ccdc129), mRNA.                                                 | 18.8977258 | 0.006956641 |
| 18716  | Pip           | Mus musculus prolactin induced protein (Pip), mRNA.                                                             | 18.1745248 | 1.31E-11    |
| 319530 | Zfp750        | Mus musculus zinc finger protein 750 (Zfp750), mRNA.                                                            | 17.7800559 | 0.036627556 |
| 330406 | B4galnt3      | Mus musculus beta-1,4-N-acetyl-galactosaminyl transferase 3 (B4galnt3), mRNA.                                   | 17.3181996 | 0.000461297 |
| 140475 | Bsnd          | Mus musculus Bartter syndrome, infantile, with sensorineural deafness (Barttin) (Bsnd), mRNA.                   | 14.6852147 | 0.042263563 |
| 12023  | Barx2         | Mus musculus BarH-like homeobox 2 (Barx2), mRNA.                                                                | 14.6270941 | 0.0009383   |
| 16613  | Klk1b11       | Mus musculus kallikrein 1-related peptidase b11 (Klk1b11), mRNA.                                                | 12.7105542 | 0.007419035 |

|        |               |                                                                                      |             |             |
|--------|---------------|--------------------------------------------------------------------------------------|-------------|-------------|
| 217294 | BC006965      | Mus musculus cDNA sequence BC006965 (BC006965), non-coding RNA.                      | 11.6181763  | 0.004984787 |
| 17700  | Mstn          | Mus musculus myostatin (Mstn), mRNA.                                                 | 11.3525523  | 9.78E-05    |
| 13711  | Elf5          | Mus musculus E74-like factor 5 (Elf5), mRNA.                                         | 11.1674607  | 0.000566499 |
| 19194  | Bpifa2        | Mus musculus BPI fold containing family A, member 2 (Bpifa2), mRNA.                  | 9.67263366  | 6.43E-11    |
| 14545  | Gdap1         | Mus musculus ganglioside-induced differentiation-associated-protein 1 (Gdap1), mRNA. | 9.44273111  | 0.005967238 |
| 20599  | Smr3a         | Mus musculus submaxillary gland androgen regulated protein 3A (Smr3a), mRNA.         | 8.77579487  | 7.05E-11    |
| 69563  | 2310015B20Rik | Mus musculus RIKEN cDNA 2310015B20 gene (2310015B20Rik), non-coding RNA.             | 8.71582535  | 0.001669507 |
| 319894 | E330017L17Rik | Mus musculus RIKEN cDNA E330017L17 gene (E330017L17Rik), non-coding RNA.             | 7.47747957  | 1.96E-07    |
| NA     | 1600029D21Rik | Mus musculus RIKEN cDNA 1600029D21 gene (1600029D21Rik), mRNA.                       | 7.33464043  | 0.002359379 |
| 69564  | Nmrk2         | Mus musculus nicotinamide riboside kinase 2 (Nmrk2), mRNA.                           | 7.15528563  | 0.010482802 |
| 11464  | Actc1         | Mus musculus actin, alpha, cardiac muscle 1 (Actc1), mRNA.                           | 6.93060129  | 8.30E-09    |
| 20472  | Six2          | Mus musculus sine oculis-related homeobox 2 (Six2), mRNA.                            | 6.38024811  | 0.009154531 |
| 17879  | Myh1          | Mus musculus myosin, heavy polypeptide 1, skeletal muscle, adult (Myh1), mRNA.       | 6.349246781 | 5.42E-09    |
| 68172  | Rpl39l        | Mus musculus ribosomal protein L39-like (Rpl39l), mRNA.                              | 5.68611274  | 2.99E-21    |
| 382384 | Odf3l2        | Mus musculus outer dense fiber of sperm tails 3-like 2 (Odf3l2), mRNA.               | 5.52195678  | 0.000742083 |
| 433294 | Mettl21c      | NA                                                                                   | 5.48069125  | 0.00826009  |
| 545798 | Tmem233       | Mus musculus transmembrane protein 233 (Tmem233), mRNA.                              | 5.06040033  | 0.012153065 |

Supplemental Table 3: **primer sequences used for qRT-PCR.**

| <b>Gene symbol</b> | <b>Accession number</b> | <b>Forward Sequences (5'-3')</b> | <b>Reverse Sequences(5'-3')</b> |
|--------------------|-------------------------|----------------------------------|---------------------------------|
| Actc1              | NM_009608               | CCAGCCCTCTTTCATTGGTATGGA         | TGCCTCCAGATAGGACATTGTTGG        |
| Adipoq             | NM_009605               | CGTGATGGCAGAGATGGCACTC           | AGCGATACACATAAGCGGCTTCTCC       |
| Adrb1              | NM_007419               | ACGACGACGACGACGACGC              | CTTGGAAGTCCGAGGAGAAGCCC         |
| Adrb2              | NM_007420               | CTACTGTCGGAGTCCAGATTTTCAGGAT     | TGCTATTGCTAGAGTAGCCGTTCCC       |
| Adrb3              | NM_013462               | GCACAGGAATGCCACTCCAATC           | TCGAGCATAGACGAAGAGCATCACA       |
| aP2                | NM_024406               | ACACCGAGATTTCCTTCAAACCTG         | CCATCTAGGGTTATGATGCTCTTCA       |
| Beta-actin         | NM_007393               | GGC ACC ACA CCT TCT ACA ATG      | GGG GTG TTG AAG GTC TCA AAC     |
| Bglap2             | NM_001032298            | CAGGAGGGCAATAAGGTAGTGAACAG       | CAAGCCATACTGGTCTGATAGCTCGT      |
| Bglap3             | NM_001305448            | TCCAAGCAGGAGGGCAATAAGGT          | CACAAGCAGGGTCAAGCTCACATAG       |
| Bhlha15            | NM_010800               | GCGCCAGGCCCTAAATTATACCA          | GCTGTGGATCTGTGTAGAGTAGCGTTG     |
| Cebpa              | NM_007678               | AGTACCGGGTACGGCGGGAAC            | GCGTGTCCAGTTCACGGCTCA           |
| Cebpb              | NM_009883               | GGACAAGCTGAGCGACGAGTACAAG        | TGCTTGAACAAGTTCGCGAGGG          |
| Cd137              | NM_011612               | CCAGTACCACCATTTCTGTGACTCCA       | ATGAAGATCAGGGCCAGCAGCA          |
| Cd36               | NM_001159558            | TCCTCTGACATTTGCAGGTCTATCTACG     | AGGCATTGGCTGGAAGAACAATC         |
| Cidea              | NM_007702               | TCAGACCTTAAGGGACAACACGCA         | TGACATTGAGACAGCCGAGGAAGT        |
| Cited1             | NM_001276474            | CAGGCTCTGAAATGCCAACTATGTC        | TTGGAGTAGGCCAGAGAGTTCATCTC      |
| Cox5b              | NM_009942               | CAGGCACCAAGGAAGACCCTAATCT        | CATCGCTGACTCTCGCCTTTGT          |
| Cox8b              | NM_007751               | AAGCGCCTGCGAAGTTCACAGT           | GCTAAGACCCATCCTGCTGGAACC        |
| Cox7a1             | NM_009944               | AACCGTGTGGCAGAGAAGCAGAA          | CAGAGTCAGCGTCATGGTCAGTCTG       |
| Cst10              | NM_021405               | GTTGTGGCTGGGAAGAACTACTACTTGA     | CGTTGATCTGGAAATTACAGATGACCC     |
| Cycs               | NM_007808               | GGACCAAATCTCCACGGTCTGTTCG        | AAATACTCCATCAGGGTATCCTCTCCC     |
| Dio2               | NM_010050               | TGTGTCTGGAACAGCTTCTCCTAGA        | AAGTCAAGAAGGTGGCATTGCGGC        |
| Ebf2               | NM_001276387            | GCATTTCAGAGTCCACACAAGGAAATAA     | ATGCTGTTGCTGGAGGTGCTGTAAT       |
| Glut1              | NM_011400               | GCAGATGATGCGGGAGAAGAAGG          | GCCTTCTCGAAGATGCTCGTTGA         |
| Glut4              | NM_009204               | CTGATTCTGCTGCCCTTCTGTCCT         | GACATTGGACGCTCTCTCTCCAACCT      |
| HoxC8              | NM_010466               | ACTCGTCTCCCAGCCTCATGTTTC         | CTCTAGTTCCAAGGTCTGATACCGGC      |
| HoxC9              | NM_008272               | GGCAGCAAGCACAAGAGAGAGAA          | AGTTCCAGCGTCTGGTACTTGGTGTA      |
| Hsl                | NM_001039507            | CATGGCTCAACTCCTTCTGGAAC          | TTCAAGGTATCTGTGCCAGTAAGCC       |
| Kcnk3              | NM_010608               | CTTCTACTTCGCCATCACCGTCA          | TGCCAGCAGCGCGTAGAACAT           |
| Lhx1               | NM_008498               | AAGCCACACGCCATATCCGT             | AGCTGTTTCATCCTTCGCTCCTTG        |
| Lhx8               | NM_010713               | AGACCCTCCAGAACTGGCAGAAA          | TGGTTGGGACTGACGTGTTTCTTATG      |
| Lpl                | NM_008509               | CCAGGATGCAACATTGGAGAAGC          | GCAGGGAGTCAATGAAGAGATGAATG      |
| Klk1               | NM_010639               | CAGCTCCTGGACTCCTGTTACCATG        | CCTCCAACAATTCGAGACTGGACAG       |
| Mstn               | NM_010834               | GGCCATGATCTTGCTGTAACCTTCC        | AGTGCTCATCGCAGTCAAGCCC          |
| Mtus1              | NM_001005865            | TTCCTTCGGGGCTCAGGAAA             | TCGGAGGACAGCACATCTGG            |
| Pax9               | NM_011041               | GCAGTGAATGGATTGGAGAAGGG          | CATGCTGGATGCTGAGACGAACT         |
| Pgc1a              | NM_008904               | GTCAACAGCAAAAGCCACAA             | TCTGGGGTCAGAGGAAGAGA            |
| Pparg2             | NM_011146               | AGGGCGATCTTGACAGGAAAGACA         | AAATTCCGATGGCCACCTCTTTGC        |
| Prdm16             | NM_027504               | TCATATGCGAGGTCTGCCACAAGT         | TAGTGCTGAACATCTGCCACAGT         |
| Tbx1               | NM_011532               | TCGTGAGTGCCCTTGCTCGCT            | TGCGTAGCGTCGCCGAGC              |
| Tfap2b             | NM_009334               | CTGCTAAAGCCGTGTCCGAGTATT         | CTGAGCCAGCAGATCCGTAAATTC        |
| TBP                | NM_013684               | CATTCTCAAACCTGACCACTGCACC        | GAAGCTGCGGTACAATTCAGAGC         |

|        |           |                              |                           |
|--------|-----------|------------------------------|---------------------------|
| Ucp1   | NM_009463 | AGCCACCACAGAAAGCTTGTCAAC     | ACAGCTTGGTACGCTTGGGTACTG  |
| Ucp2   | NM_011671 | ATACTCTCCTGAAAGCCAACCTCATG   | TCTCGTCTTGACCACATCAACAGG  |
| Ucp3   | NM_009464 | AAGTTGCTGGAGTCTCACCTGTTTACTG | CATGTATCGGGTCTTTACCACATCC |
| Zic1   | NM_009573 | GCGTTCAGAGAACCTCAAGATCCAC    | AAAGGTAGGGCTTGTGCTCGTG    |
| Zfp423 | NM_033327 | GGCATGGGCGGTACCTTCAAGT       | CTTCTGTGGGCACTGCGAGCA     |

## Methods

**Animals** All mouse experiments (except adipose tissue transplantation experiments) involved using male C57BL/6 mice acquired from the Center for Comparative Medicine Production Colony at Baylor College of Medicine (BCM). For adipose tissue transplantation experiments, 12-week-old male C57BL/6 mice from Charles River Laboratories were used as donor and recipient mice for transplantation by Dr. Stanford's group at Ohio State University (OSU). All animals were maintained on a standard 12-hour light/12-hour dark cycle at 22°C with free access to standard rodent chow and water. Mice were fed a standard mouse diet 5V5R Rodent Diet (LabDiet Inc.) for mice at BCM and 9F 5020 Lab Diet (PharmaServ Inc.) for mice at OSU. All experiments were approved by the Animal Care Research Committees at Baylor College of Medicine and at the Ohio State University. *aP2-Cre* (stock number: 005069) and *ROSA<sup>mTmG</sup>* (stock number: 007676) mouse lines were acquired from the Jackson Laboratory. Mice were PCR genotyped using the following primers: *aP2-Cre* mouse: forward primer OCH53 5'CTAAGTCCAGTGATCATTGCCAGGGA3', reverse primer OCH54 5'CCGGCAAACGGACAGAAGCA3'. *ROSA<sup>mTmG</sup>* mouse: forward common primer OCH487 5'CTCTGCTGCCTCCTGGCTTCT3', wild-type reverse primer OCH488 5'CGA GGCGGATCACAAGCAATA 3', and mutant reverse primer OCH489 5'TCAATGGGCGG GGGTCGTT3'.

**Embryo processing, histology, and Immunohistochemistry** For histological analyses, mouse embryos were collected at various developmental stages, fixed in 4% paraformaldehyde at 4°C overnight, dehydrated in 100% ethanol, and embedded in paraffin. These embryos were sectioned at 6 µm-thickness and stained with Hematoxylin



and Eosin (H&E) or used for immunohistochemistry (IHC) as previously described (1). Primary antibodies used for IHC are rabbit anti-UCP1 (1:50-100 dilution; ab23841, Abcam), rabbit anti-FABP4/aP2 (1:300 dilution; ab13979, Abcam), and mouse anti-PPAR $\gamma$  (1:50-100 dilution; ab59256, Abcam). H&E and IHC stained sections were imaged using a DS-Fi1 camera connected to a Nikon Eclipse 80i stereomicroscope and were processed using Nikon NIS Elements AR 3.2 software.

**Isolation of adipose tissues** iBAT, iWAT (inguinal WAT), and eWAT (epididymal WAT) were isolated as previously described (2). To isolate scBAT, we first made a skin incision from the sternum to the lower jaw with surgical scissors at the ventral midline. We further opened the skin incision laterally to reveal the ventral neck structures, including subcutaneous WAT, the superficial muscle layer, and the salivary gland. We then removed the superficial muscle layer and moved the salivary gland upward with a pair of forceps to expose the inner neck structures, including the scBAT, jugular veins, sternocleidomastoid muscles, and trachea (covered by the sternohyoid muscle) under the dissecting microscope (SMZ1500, Nikon). scBAT was then carefully dissected free from the connecting veins using a pair of fine forceps. After thoroughly removing any non-adipose tissues from iBAT, scBAT, sWAT, and vWAT, the weights were recorded. For gene expression analyses of scBAT and iBAT from CL316243 treated mice, 12-week old mice received 1 mg/kg daily i.p. injection for 3 days, and adipose tissues were collected 24 hours after the final injection.

**Lipid droplet size measurement** H&E stained adipose tissue sections from 8-week old mice were imaged at 400x magnification using a DS-Fi1 camera connected to a Nikon Eclipse 80i stereomicroscope. Lipid droplet size in the center area (70  $\mu$ m x 70  $\mu$ m) of

each image was measured using the area measurement tool from the Nikon NIS Elements AR 3.2 software. Four to eight adipose tissue sections were randomly selected for the measurement. A total of 1667 lipid droplets from iBAT, 1100 lipid droplets from scBAT, 182 lipid droplets from iWAT, and 28 lipid droplets from eWAT were measured.

**RNA isolation and Quantitative RT-PCR (qRT-PCR)** Frozen adipose tissues were ground in liquid nitrogen using a pre-chilled mortar and pestle and homogenized in PureZOL RNA isolation reagent (Bio-Rad) using a hand held homogenizer (Pestle Cordless Motor, Kimble Chase). Total RNA was extracted using an Aurum Total RNA Fatty and Fibrous Tissue Kit following the manufacturer's instructions (Bio-Rad). Two µg of total RNA was used to synthesize first-strand cDNA using the SuperScript III First-Strand Synthesis System (Invitrogen). Quantitative PCR reactions were performed using Platinum SYBR Green qPCR SuperMix-UDG (Invitrogen) in a CFX96 Touch Real-Time PCR Detection System (Bio-Rad). The  $\Delta C_t$  method ( $2^{-\Delta C_t}$ ) was used to calculate the relative mRNA expression level of each gene. Specific gene expression was normalized to either b-actin or TATA box binding protein (TBP). Primers used for qRT-PCR are listed in Supplemental table 3.

**Protein isolation and western blotting** To isolate proteins, frozen adipose tissues were ground in liquid nitrogen and homogenized in RIPA buffer (50 mM Tris pH 7.4, 150 mM NaCl, 5 mM EDTA, 1% Triton X-100, 1% Na Deoxycholate, 0.1% SDS) containing proteinase inhibitor cocktail (Sigma-Aldrich). Protein concentrations were determined using a Pierce BCA protein assay kit (Thermo Fisher Scientific). Western blotting was performed as previously described (3). Briefly, 10-30 µg of protein lysates were subjected to SDS-page gel electrophoresis and transferred to Immune-Blot PDVF membranes (Bio-

Rad). These membranes were further blocked in 5% milk/TBST buffer (50 mM Tris PH 7.5, 150 mM NaCl) overnight at 4°C and incubated with primary antibodies in 3-5% BSA/TBST for 2 hours and with secondary antibodies in 2.5% milk/TBST for 1 hour at room temperature. Membranes were developed using Pierce ECL Plus western blotting substrate (Thermo Fisher Scientific). Primary antibodies used for western blotting are rabbit anti-UCP1 (1:10,000 dilution; ab10983, Abcam), rabbit anti-FABP4/aP2 (1:2000 dilution; 3544, Cell Signaling), mouse anti-PPAR $\gamma$  (1:2000 dilution; sc-7273, Santa Cruz), rabbit anti-COXIV (1:5000 dilution; 4844, Cell Signaling), and rabbit anti- $\beta$ -actin (1:5000 dilution; 4967, Cell Signaling). Secondary antibodies used in this study include: anti-mouse-HRP (1:5000 dilution, Jackson Immuno Research Laboratory) and anti-rabbit HRP (1:5000 or 1:15,000 (for UCP1) dilution, Jackson Immuno Research Laboratory).

**Isolation, immortalization, and differentiation of the stromal vascular fraction (SVF) from supraclavicular BAT** Isolation and immortalization of the SVF from scBAT was performed as previously described (3). For immortalization, scBAT from 3 one-week old mice were pooled together. scBAT was dissected out under the dissecting microscope, rinsed briefly with PBS, and minced into small pieces with a blade. Minced tissue was digested in 1 ml of digestion media (0.155 u/mg collagenase D, 0.5 u/g Dispase II, 10 mM CaCl<sub>2</sub> in PBS) with shaking at 70 rpm for 30 min at 37°C. After digestion, 10 ml fresh media (DMEM + 10% FBS + Pen/Strep) was added to the tube to neutralize the digestion mixture, which was filtered through a cell strainer (70  $\mu$ m diameter) to remove any undigested debris and centrifuged at 500 g for 5 min to pellet the stromal-vascular fraction. The top liquid layer containing floating mature adipocytes was aspirated, and the pelleted SVF was washed twice with media and plated onto a 35 mm cell culture plate.

Twenty-four hours after plating, these stromal-vascular cells were washed twice with cold PBS to remove the red blood cells and immortalized with large T antigen following a previously published procedure (3). The immortalized stromal-vascular cells (named P7scBAT-C4 cells) containing supraclavicular brown preadipocytes were cultured in growth media until confluent and differentiated with standard induction medium containing 3-isobutyl-1-methylxanthine (IBMX) (0.5 mM), Dexamethasone (1  $\mu$ M), Insulin (5  $\mu$ g/ml), and T3 (1 nM) for 48 hours. Cells were maintained in media containing Insulin and T3 until fully differentiated. Thermogenesis was induced by incubating with 10  $\mu$ M Isoproterenol for 6 hours. Oil-red O staining was performed as previously described (1).

**RNA-sequencing and data analysis** Total RNA was isolated from scBAT, iBAT, iWAT, and eWAT using the method described in the section for RNA isolation. After isolation, 500 ng of total RNA from each adipose tissue sample was sent to the Baylor College of Medicine Genomic and RNA profiling Core for quality checks. Two hundred and fifty ng of total RNA was then used to generate double-stranded DNA libraries using the Illumina TruSeq RNA library preparation protocol. Briefly, cDNA was created using the fragmented 3' poly (A) selected portion of total RNA and random primers. Libraries were created from the cDNA by first blunt ending the fragments, attaching an adenosine to the 3' end, and ligating unique adapters to the ends. The ligated products were then amplified using 15 cycles of PCR. The resulting libraries were quantitated using a NanoDrop spectrophotometer, and fragment size was assessed with an Agilent 2100 Bioanalyzer. A qPCR assay was performed on the libraries to determine the concentration of adapter ligated fragments using the Applied Biosystems ViiA 7 Quantitative PCR instrument and a KAPA Library Quant Kit. All samples were pooled at equimolar amounts, re-quantified

by qPCR, and re-assessed on the Bioanalyzer. Using the pooled concentration from the qPCR assay, the library pool was loaded onto two rapid run flow cells, each at a concentration of 11pM for on-board cluster generation and paired-end sequencing on a HiSeq 2500 at a read length of 100 bp. For mapping and analyzing gene expression, 11 low-quality nucleotides from the 5' ends of the raw reads were trimmed. The resulting 90-nucleotide paired-end reads were mapped to the mouse genome (mm10) using STAR (4) with NCBI RefSeq genes as the reference. In order to reduce possible PCR biases, read duplicates were removed using picard tools (<http://broadinstitute.github.io/picard/>). HTseq (<http://www-huber.embl.de/users/anders/HTSeq>) was used to determine the number of reads mapping to known genes. EdgeR (5) was used to analyze the gene-based read counts to detect differentially expressed genes between different adipose tissue samples. The false discovery rate (FDR) of the differentially expressed genes was estimated using Benjamini and Hochberg method.  $FDR < 0.05$  was considered statistically significant. The heat map and principal component analysis (PCA) for Figure 6C and 6D were conducted using R. Venn diagrams were constructed using VENNY<sup>2.1</sup> (<http://bioinfogp.cnb.csic.es/tools/venny/index.html>) and Gene ontology enrichment was determined using DAVID 6.7 to analyze biological process enrichment in the set of genes with 5 fold higher expression in scBAT than in iWAT ( $FDR < 0.05$ ) (6, 7). The heat map for Figure 7A was conducted with Multi-experiment Viewer 4.9.0 (MeV).

**Transmission electron microscopy (TEM)** Adipose tissues were immediately fixed in modified Karnovsky's fixative (2% paraformaldehyde plus 2.5% glutaraldehyde in 0.1M cacodylate buffer) after isolation, and minced into blocks. WAT was fixed under vacuum for 3 hours; BAT was fixed at normal pressure for 3 hours. Both tissues were then left

overnight in weak fixative (1:10) at 4°C. The next day, tissue blocks were rinsed in 0.1M cacodylate buffer and osmicated for 1 hour. Blocks were then rinsed in dH<sub>2</sub>O and dehydrated through a gradient series of ethanols until 100% ethanol was reached. Blocks were then embedded in Spurr's Low Viscosity resin (8) and polymerized at 60 °C for 3 days. Thin sections were cut using a Diatome Ultra45 knife on a RMC MT6000-XL ultra-microtome, and 60nm sections were collected on 150 hex mesh copper grids. Grids were stained in saturated aqueous uranyl acetate and counter-stained in Reynold's lead citrate (9). Grids were examined on a JEOL 1230 transmission electron microscope, and images were captured using a Gatan US1000 digital camera and Digital Micrograph v1.82.366 software.

**BAT transplantation** Transplantation was performed using BAT removed from the interscapular (iBAT) or supraclavicular (scBAT) region of 12-week-old male C57BL/6 mice. After euthanasia of donor mice by cervical dislocation, BAT was removed and incubated in 10 ml saline at 37°C for 20–30 minutes. Twelve-week-old C57BL/6 recipient mice were anesthetized with isoflurane. For each recipient mouse, 0.1g of donor BAT (iBAT or scBAT) was transplanted into the visceral cavity. The transplant was carefully lodged deep between folds within the endogenous epididymal fat of the recipient (10, 11). Mice that were sham operated underwent the same procedure, but instead of receiving BAT, their epididymal fat pad was located, exposed, and then replaced.

**Glucose (GTT) and Insulin (ITT) Tolerance Tests** For glucose tolerance tests, mice were fasted for 11 hours (22:00–9:00) with free access to drinking water. A baseline blood sample was collected from the tail of fully conscious mice, followed by i.p. injection of glucose (2.0 g/kg body weight). Blood was taken from the tail at 15, 30, 60, 90, and 120



minutes after injection. ITTs were performed at 12 weeks after transplantation. Mice were fasted for 2 hours (12:00–14:00), and baseline blood samples were collected from the tail of fully conscious mice. Insulin (1 U/kg body weight) (Humulin; Eli Lilly) was administered by i.p. injection, and blood samples were taken from the tail at 10, 15, 30, 45, and 60 minutes after injection. Glucose concentrations were determined from blood using a OneTouch Ultra portable glucometer (LifeScan).

**Core body temperature measurement** For BAT transplanted mice, mice were fasted overnight, and body temperature was determined using an animal rectal probe connected to a TH-8 thermometer (Physitemp). Basal temperature was determined, and animals were then placed at 4°C, and body temperature was measured at 15, 30, 60, 90, and 120 minutes.

**Statistical analyses** The two tailed *t* test was used to evaluate statistical significance between 2 groups. One-way ANOVA was used to evaluate statistical significance between 3 or more groups. A *P* value less than 0.05 was considered statistically significant. Statistical analyses were performed using GraphPad Prism 6 software.

**Study Approval** All animal experiments were approved by the Institutional Animal Care and Use Committees of Baylor College of Medicine (BCM) and the Ohio State University.

## References

1. Nosavanh L, Yu DH, Jaehnig EJ, Tong Q, Shen L, and Chen MH. Cell-autonomous activation of Hedgehog signaling inhibits brown adipose tissue development. *Proc Natl Acad Sci U S A*. 2015;112(16):5069-74.

2. de Jong JM, Larsson O, Cannon B, and Nedergaard J. A stringent validation of mouse adipose tissue identity markers. *Am J Physiol Endocrinol Metab.* 2015;308(12):E1085-105.
3. Chen MH, Wilson CW, Li YJ, Law KK, Lu CS, Gacayan R, et al. Cilium-independent regulation of Gli protein function by Sufu in Hedgehog signaling is evolutionarily conserved. *Genes Dev.* 2009;23(16):1910-28.
4. Dobin A, Davis CA, Schlesinger F, Drenkow J, Zaleski C, Jha S, et al. STAR: ultrafast universal RNA-seq aligner. *Bioinformatics.* 2013;29(1):15-21.
5. Robinson MD, McCarthy DJ, and Smyth GK. edgeR: a Bioconductor package for differential expression analysis of digital gene expression data. *Bioinformatics.* 2010;26(1):139-40.
6. Huang da W, Sherman BT, and Lempicki RA. Systematic and integrative analysis of large gene lists using DAVID bioinformatics resources. *Nat Protoc.* 2009;4(1):44-57.
7. Huang da W, Sherman BT, and Lempicki RA. Bioinformatics enrichment tools: paths toward the comprehensive functional analysis of large gene lists. *Nucleic Acids Res.* 2009;37(1):1-13.
8. Spurr AR. A low-viscosity epoxy resin embedding medium for electron microscopy. *J Ultrastruct Res.* 1969;26(1):31-43.
9. Reynolds ES, Tomkiewicz ZM, and Dammin GJ. The Renal Lesion Related to Amphotericin B Treatment for Coccidioidomycosis. *Med Clin North Am.* 1963;47:1149-54.

10. Stanford KI, Middelbeek RJ, Townsend KL, An D, Nygaard EB, Hitchcox KM, et al. Brown adipose tissue regulates glucose homeostasis and insulin sensitivity. *J Clin Invest.* 2013;123(1):215-23.
11. Tran TT, Yamamoto Y, Gesta S, and Kahn CR. Beneficial effects of subcutaneous fat transplantation on metabolism. *Cell Metab.* 2008;7(5):410-20.
